# Supplementary material
Source: publisher site journal article supplement (https://www.dovepress.com/article/376210)
Supplement: Supplementary file 1 [file get_supplementary_file.php]

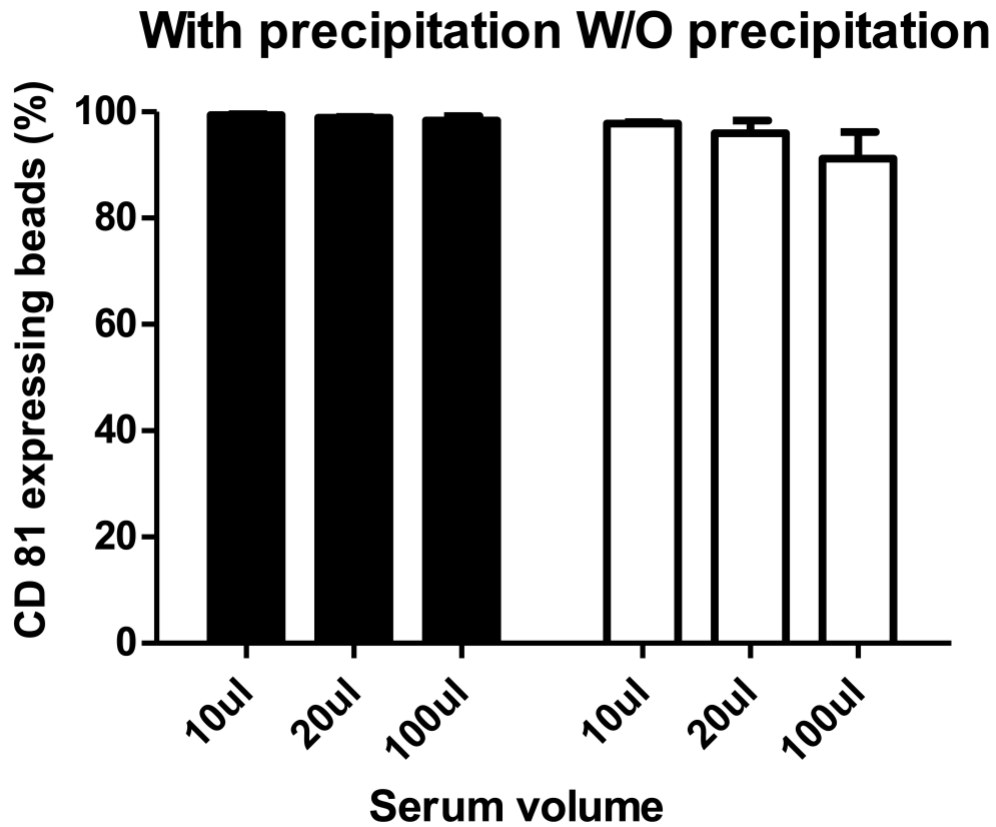

**Supplementary Figure 1:** The effect of exosome isolation/precipitation before the immune-magnetic affinity assay and serum volume on exosomal CD81 expression. CD63 coupled beads and serum samples obtained from healthy individuals were used in this analysis. There was no significant difference between isolation/precipitation and without isolation/precipitation groups in terms of exosomal CD81 expression. Additionally, serum volumes were not correlated with exosomal CD81 levels.

**a**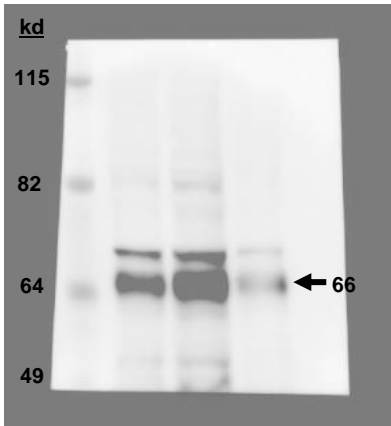**b**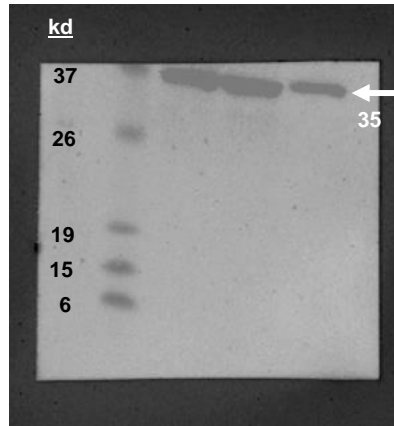**c**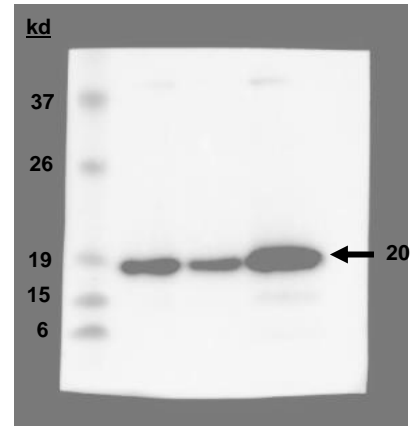

**Supplementary Figure 2.** Western blot membranes for (a) Glypican 3 (66kd), (b) CD 81 (35kd-observed), and (c) ARF6 (20kd) were demonstrated in Figure 3

**a**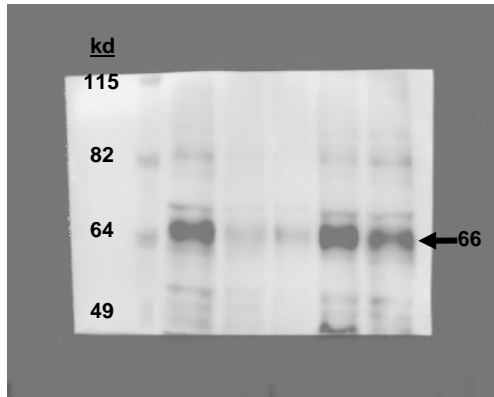**b**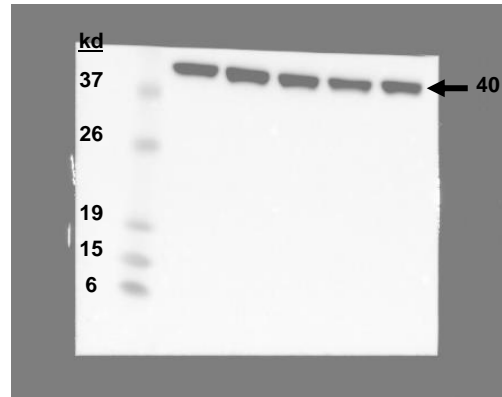**c**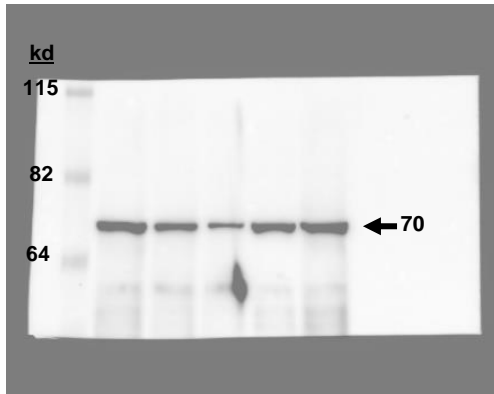**d**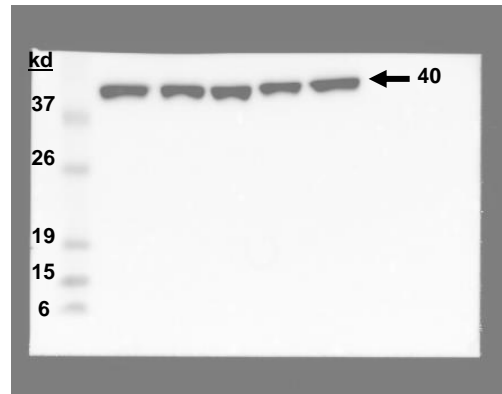

**Supplementary Figure 3.** Western blot membranes for (a) Glypican 3 (66kd), (b) Beta-actin\* (40kd), (c) CD 63 (70kd), and (d) Beta-actin(40kd) were demonstrated in Figure 5,

\*This blot was not shown in the original Figure 5.
